# Supplementary material for: Spectrofluorimetric determination of zearalenone using dispersive liquid–liquid microextraction coupled to micro-solid phase extraction onto magnetic nanoparticles
Source: Royal Society of Chemistry journal article supplement (doi:10.1039/c4ra07684b), 2014-01-01
Supplement: c4ra07684b1.pdf [file c4ra07684b1.pdf]

## Electronic Supporting information files for

# Spectrofluorimetric determination of zearalenone using dispersive liquid-liquid microextraction coupled to micro-solid phase extraction onto magnetic nanoparticles

**Mahdi Hashemi \*, Zohreh Taherimaslak, Sara Parvizi and Mohammad Torkejokar**

*Collage of Chemistry, Bu-Ali Sina University, Hamedan, Iran*

---

\* Corresponding author. Tel.: +98 81 38282807; Fax: +98 81 38257407.  
E-mail addresses: [mhashemi@basu.ac.ir](mailto:mhashemi@basu.ac.ir) (Mahdi Hashemi),

## 1) Effect of dispersive solvent volume

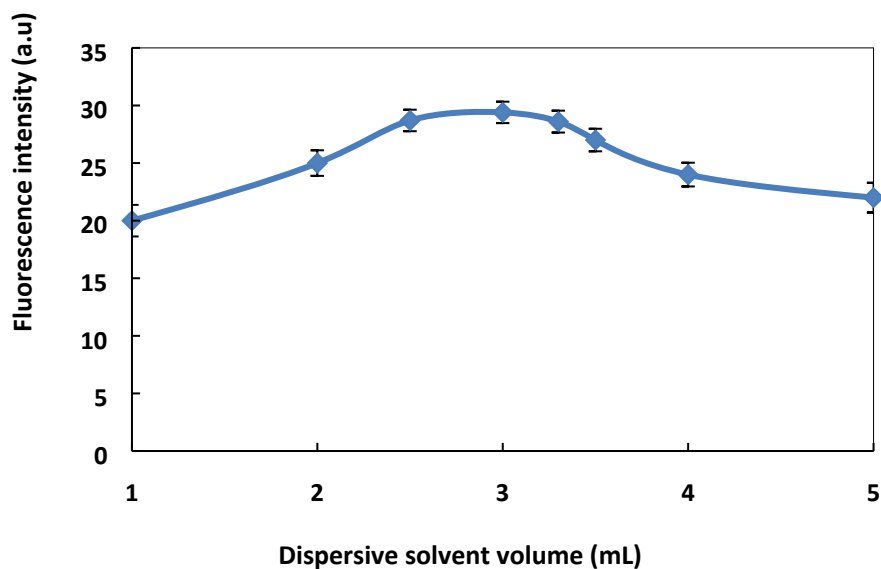

**Fig. S1** Effect of dispersive solvent volume. Conditions: dispersive solvent type, MeCN 80 % containing  $5 \mu\text{g L}^{-1}$  of ZEN; extraction solvent volume and type,  $310 \mu\text{L}$  of 1-Heptanol; water volume, 15 mL; equilibration time, 120 s; adsorbent amount, 80 mg; adsorption time, 5 min; desorption time, 5 min, desorption solvent volume and type, 1 mL of MeCN; reconstituting solvent,  $300 \mu\text{L}$  of diethyl ether; without salt addition. Error bars represent the standard deviation for three experiments.

## 2. Effect of extraction solvent volume

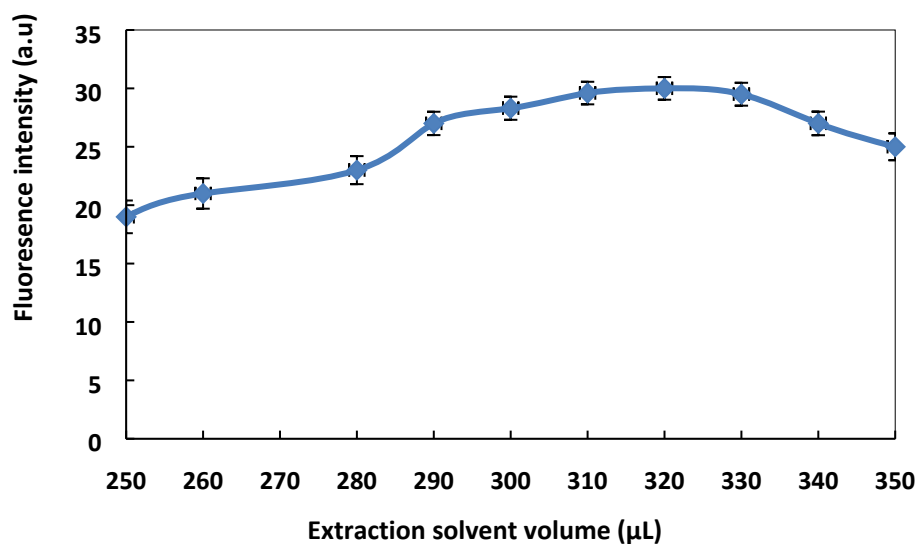

**Fig. S2.** Effect of the extraction solvent volume. Conditions: dispersive solvent volume and type, 3 mL of MeCN 80 % containing  $5 \mu\text{g L}^{-1}$  of ZEN; extraction solvent type, 1-Heptanol; water volume, 15 mL; equilibration time, 120 s; adsorbent amount, 80 mg; adsorption time, 5 min; desorption time, 5min, desorption solvent volume and type, 1 mL of MeCN; reconstituting solvent, 300  $\mu\text{L}$  of diethyl ether; without salt addition. Error bars represent the standard deviation for three experiments.

### 3. Effect of salt addition

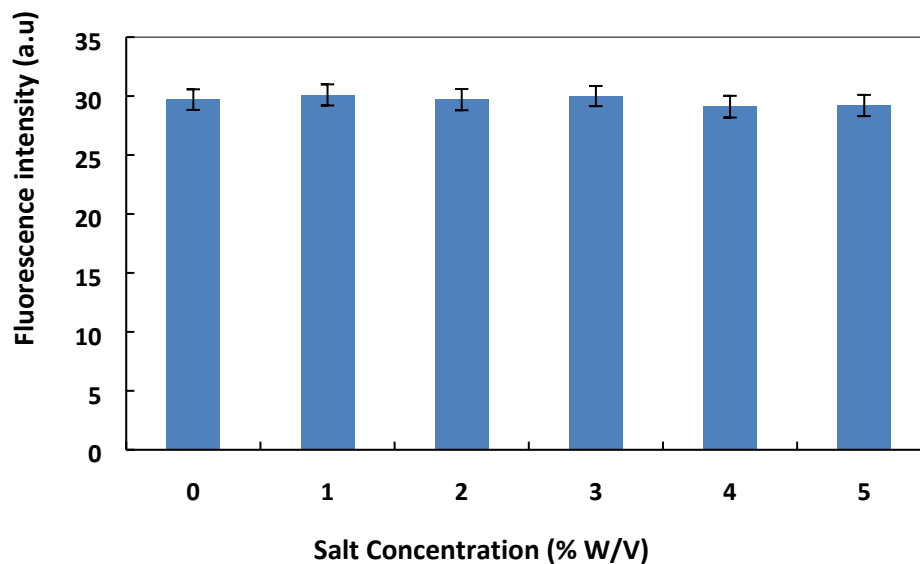

**Fig. S3.** Effect of salt addition. Conditions: dispersive solvent volume and type, 3 mL of MeCN 80 % containing  $5 \mu\text{g L}^{-1}$  of ZEN; extraction solvent volume and type, 320  $\mu\text{L}$  of 1-Heptanol; water volume, 15 mL; equilibration time, 120 s; adsorbent amount, 80 mg; adsorption time, 5 min; desorption time, 5min, desorption solvent volume and type, 1 mL of MeCN; reconstituting solvent, 300  $\mu\text{L}$  of diethyl ether..Error bars represent the standard deviation for three experiments.

#### 4. Effect of Water volume

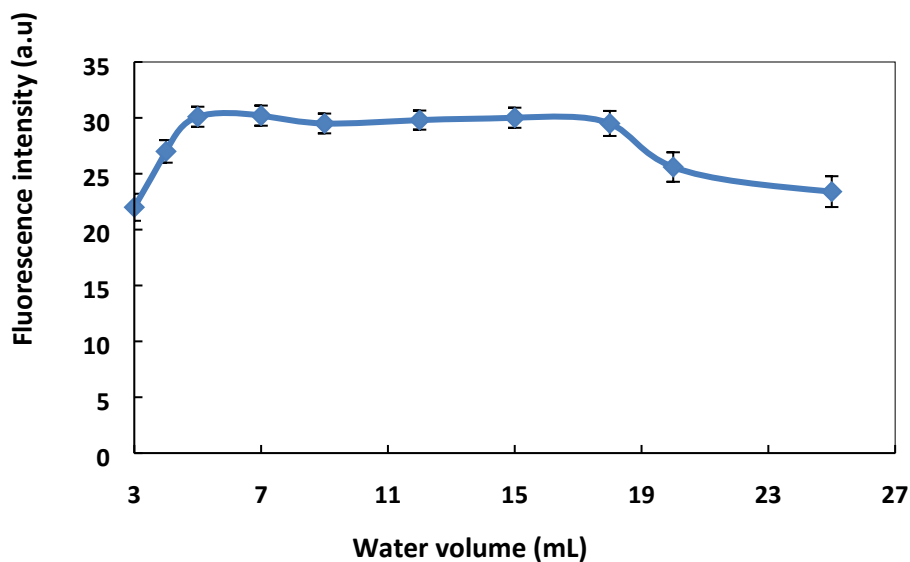

**Fig. S4.** Effect of the water volume. Conditions: dispersive solvent volume and type, 3 mL of MeCN 80 % containing  $5 \mu\text{g L}^{-1}$  of ZEN; extraction solvent volume and type,  $320 \mu\text{L}$  of 1-Heptanol; equilibration time, 120 s; adsorbent amount, 80 mg; adsorption time, 5 min; desorption time, 5 min, desorption solvent volume and type, 1 mL of MeCN; reconstituting solvent,  $300 \mu\text{L}$  of diethyl ether; without salt addition. Error bars represent the standard deviation for three experiments.

## 5. Effect of equilibration time

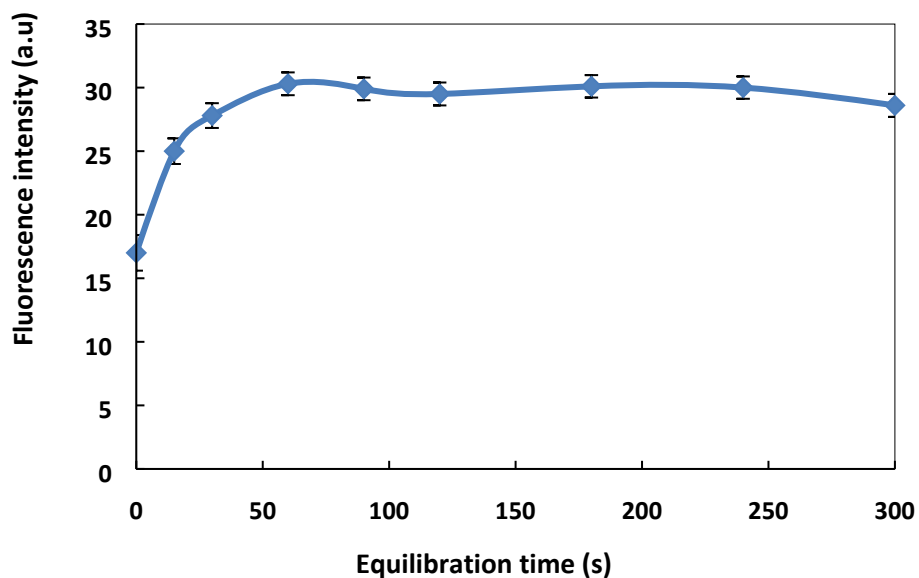

**Fig. S5.** Effect of the equilibration time. Conditions: dispersive solvent volume and type, 3 mL of MeCN 80 % containing  $5 \mu\text{g L}^{-1}$  of ZEN; extraction solvent volume and type, 320  $\mu\text{L}$  of 1-Heptanol; water volume, 15 mL; adsorbent amount, 80 mg; adsorption time, 5 min; desorption time, 5 min, desorption solvent volume and type, 1 mL of MeCN; reconstituting solvent, 300  $\mu\text{L}$  of diethyl ether; without salt addition Error bars represent the standard deviation for three experiments.

## 6. Effect of adsorbent amount

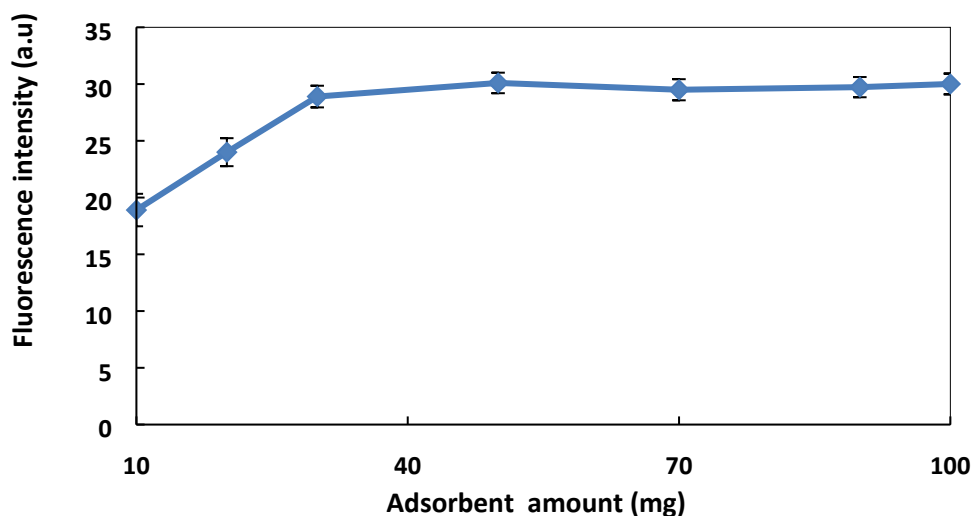

**Fig. S6.** Effect of the adsorbent amount. Conditions: dispersive solvent volume and type, 3 mL of MeCN 80 % containing  $5 \mu\text{g L}^{-1}$  of ZEN; extraction solvent volume and type, 320  $\mu\text{L}$  of 1-Heptanol; water volume, 15 mL; equilibration time, 60 s; adsorption time, 5 min; desorption time, 5 min, desorption solvent volume and type, 1 mL of MeCN; reconstituting solvent, 300  $\mu\text{L}$  of diethyl ether; without salt addition. Error bars represent the standard deviation for three experiments.

## 7. Effect of adsorption time

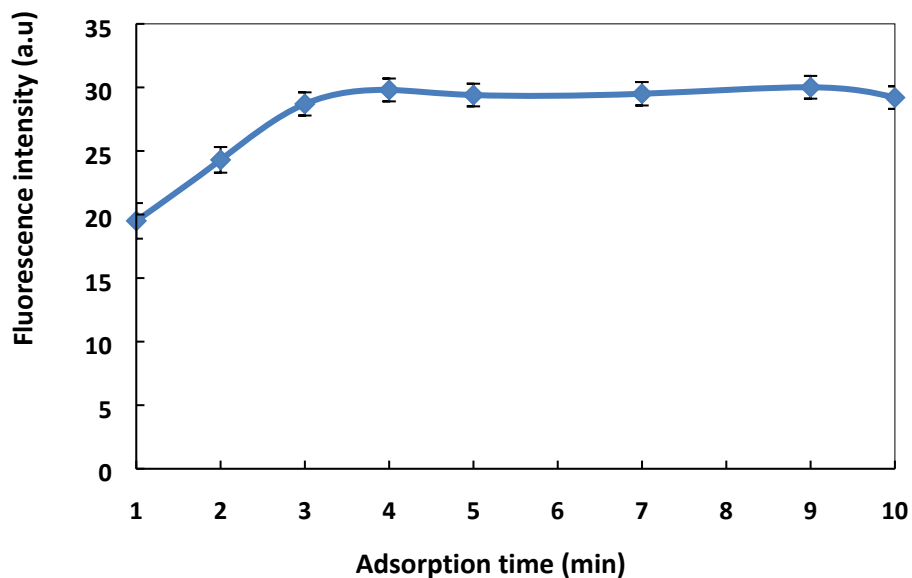

**Fig. S7.** Effect of the adsorption time. Conditions: dispersive solvent volume and type, 3 mL of MeCN 80 % containing  $5 \mu\text{g L}^{-1}$  of ZEN; extraction solvent volume and type, 320  $\mu\text{L}$  of 1-Heptanol; water volume, 15 mL; equilibration time, 60 s; adsorbent amount, 50 mg; desorption time, 5 min, desorption solvent volume and type, 1 mL of MeCN; reconstituting solvent, 300  $\mu\text{L}$  of diethyl ether; without salt addition Error bars represent the standard deviation for three experiments.



## 8. Effect of desorption solvent volume

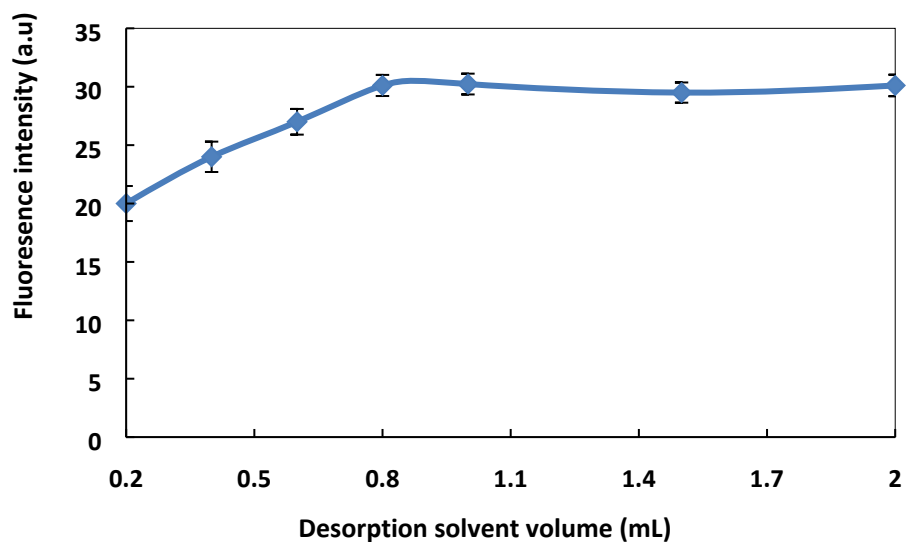

**Fig. S8.** Effect of desorption solvent volume. Conditions: dispersive solvent volume and type, 3 mL of MeCN 80 % containing  $5 \mu\text{g L}^{-1}$  of ZEN; extraction solvent volume and type,  $320 \mu\text{L}$  of 1-Heptanol; water volume, 15 mL; equilibration time, 60 s; adsorbent amount, 50 mg; adsorption time, 3 min; desorption time, 5 min; desorption solvent type, MeCN; reconstituting solvent,  $300 \mu\text{L}$  of diethyl ether; without salt addition Error bars represent the standard deviation for three experiments.

## 9. Effect of desorption time

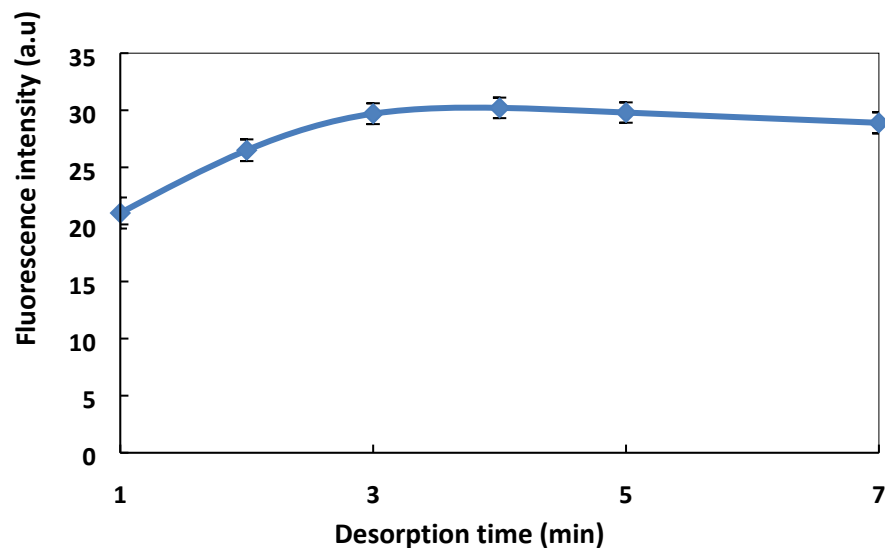

**Fig. S9.** Effect of desorption time. Conditions: dispersive solvent volume and type, 3 mL of MeCN 80 % containing  $5 \mu\text{g L}^{-1}$  of ZEN; extraction solvent volume and type, 320  $\mu\text{L}$  of 1-Heptanol; water volume, 15 mL; equilibration time, 60 s; adsorbent amount, 50 mg; adsorption time, 3 min; desorption solvent volume and type, 1 mL of MeCN; reconstituting solvent, 300  $\mu\text{L}$  of diethyl ether; without salt addition. Error bars represent the standard deviation for three experiments.

## 10. Effect of reconstituting solvent

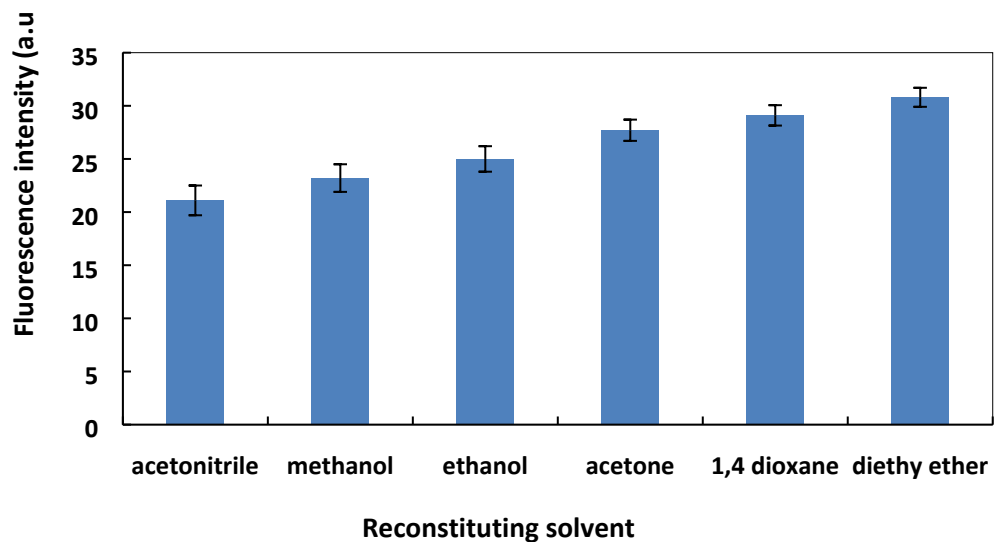

**Fig. S10.** Effect of reconstituting solvent. Conditions: dispersive solvent volume and type, 3 mL of MeCN 80 % containing  $5 \mu\text{g L}^{-1}$  of ZEN; extraction solvent volume and type, 320  $\mu\text{L}$  of 1-Heptanol; water volume, 15 mL; equilibration time, 60 s; adsorbent amount, 50 mg; adsorption time, 3 min; desorption time, 4 min; desorption solvent volume and type, 1 mL of MeCN; without salt addition. Error bars represent the standard deviation for three experiments.
